# Supplementary material for: A quantitative and efficient approach to select MIRU–VNTR loci based on accumulation of the percentage differences of strains for discriminating divergent Mycobacterium tuberculosis sublineages
Source: PubMed Central journal article supplement (PMC5567172; doi:10.1038/emi.2017.58), 2017-07-26
Supplement: emi201758x3.pdf [file emi201758x3.pdf]

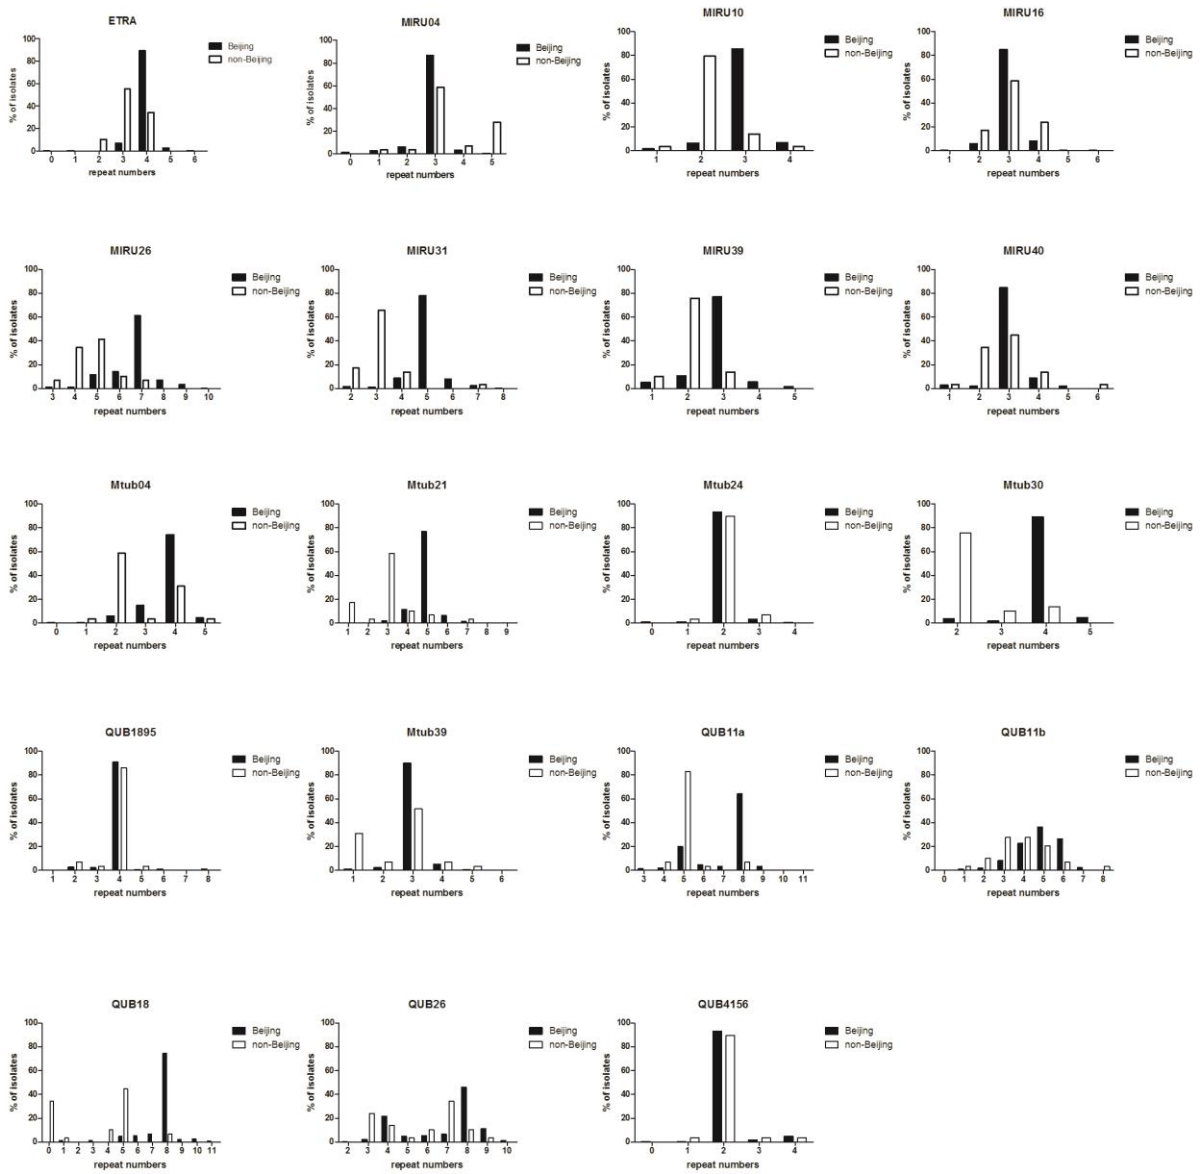

**Supplementary Figure S1** The repeat number of 19 VNTR loci respectively between Beijing (black) and non-Beijing strains (white).
