# Supplementary material for: A quantitative and efficient approach to select MIRU–VNTR loci based on accumulation of the percentage differences of strains for discriminating divergent Mycobacterium tuberculosis sublineages
Source: PubMed Central journal article supplement (PMC5567172; doi:10.1038/emi.2017.58), 2017-07-26
Supplement: emi201758x4.pdf [file emi201758x4.pdf]

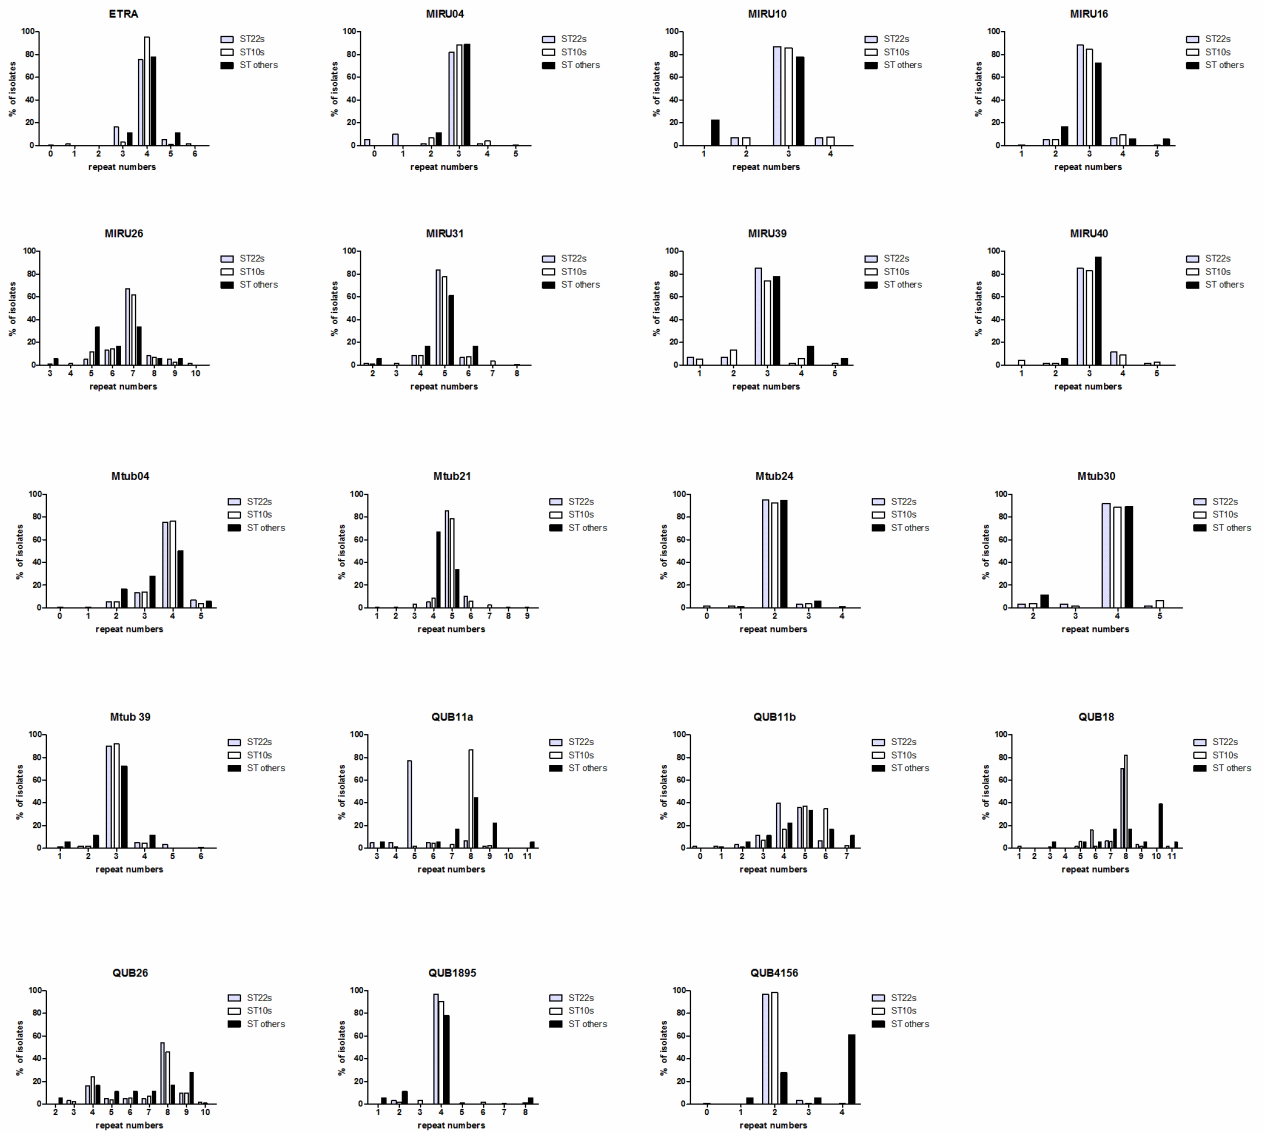

**Supplementary Figure S2** The repeat number of 19 VNTR loci respectively among ST10s (white), ST22s (gray) and ST others (black).
